# Supplementary material for: Effects of Weak- and Semi-Winter Cultivars of Wheat on Grain Yield and Agronomic Traits by Breaking through Traditional Area Planting
Source: MDPI journal article supplement (doi:10.3390/agronomy12010196), 2022-01-13
Supplement: s1 [file s1]

**Table S1** Year of release and pedigree of seven weak-winter-type and six semi-winter-type wheat cultivars planted in the Yangtze River basin, China.

| Type <sup>a</sup> | Cultivar      | Year of release | Pedigree                                               |
|-------------------|---------------|-----------------|--------------------------------------------------------|
| Weak-winter       | Annong 1124   | 2016            | 02P67/Annong 95081–8                                   |
|                   | Sumai 188     | 2012            | Selection from Yangfumai 2                             |
|                   | Yangmai 23    | 2013            | Yangmai 16/Yangfu 93–11                                |
|                   | Yangmai 20    | 2010            | Yangmai 10/Yangmai 9                                   |
|                   | Ningmai 13    | 2006            | Selection from Ningmai 9                               |
|                   | Haomai 1      | 2013            | W 4062/Zhengnong 11                                    |
|                   | Yangmai 16    | 2004            | Yang 91F138×Yang 90–30                                 |
| Semi-winter       | Zhengmai 9023 | 2003            | {(Xiaoyan 6×Xinong 65)×[83(2)3-3×84(14)43]}F3×Shan 213 |
|                   | Emai 596      | 2009            | Zhengmai 9023/Emai 12/Fengyou 7                        |
|                   | Annong 0711   | 2014            | Yannong 19/Annong 0016                                 |
|                   | Emai 580      | 2012            | Taigu genic male sterile/957565                        |
|                   | Huaimai 35    | 2013            | Zhoumai 13/Xinmai 9                                    |
|                   | Jimai 22      | 2006            | 935024/935106                                          |

<sup>a</sup> Weak-winter and semi-winter types of cultivars were bred in the southern and northern Yangtze River basin, respectively.
